# Supplementary material
Source: MDPI journal article supplement (https://www.mdpi.com/2308-3417/8/1/11)
Supplement: s1 [file s1]

**Table S1.** Comparison of visit day and postoperative day for the non-POD and POD group. POD = Postoperative delirium.

| Visit Day 1      |         |     |     | Visit Day 2      |         |     |     | Visit Day 3      |         |     |     | Visit Day 4      |         |     |     | Visit Day 5      |         |     |     |
|------------------|---------|-----|-----|------------------|---------|-----|-----|------------------|---------|-----|-----|------------------|---------|-----|-----|------------------|---------|-----|-----|
| Post-Surgery Day | Non-POD | POD | Sum | Post-Surgery Day | Non-POD | POD | Sum | Post-Surgery Day | Non-POD | POD | Sum | Post-Surgery Day | Non-POD | POD | Sum | Post-Surgery Day | Non-POD | POD | Sum |
| 1                | 797     | 78  | 875 | 2                | 780     | 85  | 865 | 3                | 772     | 60  | 832 | 4                | 738     | 51  | 789 | 5                | 697     | 51  | 748 |
| 2                | 26      | 17  | 43  | 3                | 27      | 15  | 42  | 4                | 34      | 12  | 46  | 5                | 39      | 5   | 44  | 6                | 39      | 3   | 42  |
| 3                | 8       | 7   | 15  | 4                | 11      | 3   | 14  | 5                | 14      | 3   | 17  | 6                | 13      | 3   | 16  | 7                | 14      | 2   | 16  |
| 4                | 2       | 3   | 5   | 5                | 2       | 3   | 5   | 6                | 4       | 2   | 6   | 7                | 4       | 1   | 5   | 8                | 3       | 2   | 5   |
| 5                | 2       | 4   | 6   | 6                | 4       | 2   | 6   | 7                | 1       | 3   | 4   | 8                | 1       | 1   | 2   | 9                | 0       | 1   | 1   |
| 6                | 1       | 0   | 1   | 7                | 1       | 0   | 1   | 8                | 1       | 0   | 1   | 9                | 2       | 0   | 2   | 10               | 1       | 1   | 2   |
| 7                | 0       | 1   | 1   | 8                | 0       | 2   | 2   | 9                | 0       | 2   | 2   | 10               | 1       | 2   | 3   | 11               | 1       | 2   | 3   |
| 9                | 0       | 1   | 1   | 9                | 0       | 1   | 1   | 10               | 0       | 1   | 1   | 13               | 0       | 1   | 1   | 12               | 1       | 0   | 1   |
| 17               | 0       | 1   | 1   | 10               | 0       | 1   | 1   | 11               | 0       | 0   | 0   | 14               | 0       | 1   | 1   | 13               | 0       | 1   | 1   |
| 18               | 0       | 1   | 1   | 18               | 0       | 1   | 1   | 13               | 0       | 1   | 1   | 15               | 0       | 1   | 1   | 14               | 1       | 0   | 1   |
| Sum              | 836     | 113 | 949 | 19               | 0       | 1   | 1   | 14               | 0       | 0   | 0   | 18               | 0       | 0   | 0   | 15               | 0       | 1   | 1   |
|                  |         |     |     | Sum              | 825     | 114 | 939 | 19               | 1       | 0   | 1   | 20               | 1       | 0   | 1   | 16               | 0       | 1   | 1   |
|                  |         |     |     |                  |         |     |     | 22               | 0       | 0   | 0   | 27               | 0       | 0   | 0   | 21               | 1       | 0   | 1   |
|                  |         |     |     |                  |         |     |     | Sum              | 827     | 85  | 911 | 48               | 1       | 0   | 1   | 49               | 1       | 0   | 1   |
|                  |         |     |     |                  |         |     |     |                  |         |     |     | Sum              | 800     | 66  | 866 | Sum              | 759     | 65  | 824 |
